# Supplementary material for: Network analysis uncovers putative genes affecting resistance to tick infestation in Braford cattle skin
Source: BMC Genomics. 2019 Dec 19;20:998. doi: 10.1186/s12864-019-6360-3 (PMC6923859; doi:10.1186/s12864-019-6360-3)
Supplement: Supplementary file 8 — Additional file 8: Table S8. Transcription factors (TFs) prediction for susceptible hosts. Network analysis predicted potential TFs underlying the regulation of gene expression, based on the variation of TopDEGs. The output file was manually-curated, and only the TFs found in cattle were classified according to their z-score. TopDEGs TFs were also indicated with their respective modulation and statistical significance. Network object name: network object name in MetaBase®; Actual: number of network objects in the activated dataset(s) which interact with the chosen object; n: number of network objects in the activated dataset(s); R: number of network objects in the complete database or background list which interact with the chosen object; N: total number of gene-based objects in the complete database or background list; Expected: mean value for hypergeometric distribution (n*R/N); Ratio: connectivity ratio (Actual/Expected); z-score: ((Actual-Expected)/sqrt(variance)); p-value: probability to have the given value of Actual or higher (or lower for negative z-score); Input IDs: original probe/gene IDs in the activated dataset(s); Signal: variation of gene expression in log2 FC; p-value2: statistical significance in the differential expression analysis. (XLS 48 kb) [file 12864_2019_6360_MOESM8_ESM.xls]

## Sheet: Transcription Factors - Table 1
Table S8. Transcription factors (TFs) prediction for susceptible hosts.
Transcription Factors										Spost vs.Spre_TopDEGs
Network Object Name	Actual	n	R	N	Expected	Ratio	p-value	z-score	Input IDs	Signal	p-value2
RelA (p65 NF-kB subunit)	35	233	889	43037	4.813	7.272	5.445e-20	13.94
ZNF384	3	233	11	43037	0.05955	50.37	2.503e-05	12.08
c-Fos	18	233	350	43037	1.895	9.499	1.049e-12	11.78
c-Jun	28	233	801	43037	4.337	6.457	7.243e-15	11.5
AML1 (RUNX1)	15	233	296	43037	1.603	9.36	1.044e-10	10.65
STAT1	16	233	339	43037	1.835	8.718	7.032e-11	10.53
BACH1	5	233	39	43037	0.2111	23.68	2.208e-06	10.45
NF-kB1 (p50)	18	233	462	43037	2.501	7.196	1.016e-10	9.88
STAT6	12	233	230	43037	1.245	9.637	5.779e-09	9.69
AHR	13	233	266	43037	1.44	9.027	2.921e-09	9.689
VDR	12	233	235	43037	1.272	9.432	7.351e-09	9.563
c-Rel (NF-kB subunit)	11	233	214	43037	1.159	9.494	2.935e-08	9.191
STAT5B	6	233	70	43037	0.379	15.83	2.318e-06	9.163
FOXE1	3	233	19	43037	0.1029	29.16	0.0001424	9.06
SP1	34	233	1601	43037	8.668	3.923	1.149e-11	8.793
RelB (NF-kB subunit)	10	233	195	43037	1.056	9.472	1.29e-07	8.748
JunB	8	233	133	43037	0.7201	11.11	7.169e-07	8.616
FLI1	7	233	112	43037	0.6064	11.54	2.785e-06	8.244
EGR3	3	233	23	43037	0.1245	24.09	0.0002561	8.173
IRF5	4	233	42	43037	0.2274	17.59	7.973e-05	7.937
Fra-1	6	233	90	43037	0.4873	12.31	1.006e-05	7.927
ZNF148	4	233	43	43037	0.2328	17.18	8.754e-05	7.833
ETV6(TEL1)	3	233	25	43037	0.1353	22.16	0.0003299	7.81
ELF4	2	233	12	43037	0.06497	30.78	0.001859	7.613
NF-AT1(NFATC2)	6	233	100	43037	0.5414	11.08	1.841e-05	7.447
STAT3	17	233	635	43037	3.438	4.945	8.625e-08	7.389
RUNX2	8	233	172	43037	0.9312	8.591	4.919e-06	7.36
STAT5A	6	233	106	43037	0.5739	10.46	2.564e-05	7.191
ATF-3	7	233	141	43037	0.7634	9.17	1.272e-05	7.169
TCF7L1 (TCF3)	5	233	77	43037	0.4169	11.99	6.409e-05	7.124
Bcl-6	7	233	149	43037	0.8067	8.678	1.82e-05	6.926
SP3	14	233	512	43037	2.772	5.051	9.531e-07	6.803
LMX1B	2	233	15	43037	0.08121	24.63	0.002925	6.753
ELF3	3	233	33	43037	0.1787	16.79	0.000758	6.695
LHX8	1	233	4	43037	0.02166	46.18	0.02148	6.667
HEYL	1	233	4	43037	0.02166	46.18	0.02148	6.667
GATA-2	8	233	201	43037	1.088	7.352	1.533e-05	6.659
ERG	5	233	97	43037	0.5252	9.521	0.0001915	6.199
NF-kB1 (p105)	4	233	65	43037	0.3519	11.37	0.0004375	6.171
POU4F2	2	233	18	43037	0.09745	20.52	0.004217	6.112
GFI-1	3	233	40	43037	0.2166	13.85	0.001335	6
TRPS1	2	233	19	43037	0.1029	19.44	0.004697	5.932
c-Maf	3	233	43	43037	0.2328	12.89	0.001648	5.754
ARNT	4	233	77	43037	0.4169	9.595	0.0008314	5.57
HIF1A	14	233	661	43037	3.579	3.912	1.747e-05	5.567
ETS2	5	233	126	43037	0.6822	7.33	0.0006393	5.25
ELF1	4	233	85	43037	0.4602	8.692	0.001203	5.237
GATA-3	13	233	645	43037	3.492	3.723	5.779e-05	5.141
C/EBPgamma	2	233	25	43037	0.1353	14.78	0.008066	5.084
ELF5	2	233	25	43037	0.1353	14.78	0.008066	5.084
C/EBP zeta	4	233	93	43037	0.5035	7.944	0.001677	4.946
LHX2	9	233	376	43037	2.036	4.421	0.0002317	4.916
RARalpha	5	233	141	43037	0.7634	6.55	0.00106	4.87
NF-AT5	2	233	27	43037	0.1462	13.68	0.00937	4.863
SMAD3	7	233	253	43037	1.37	5.111	0.0004895	4.838
ETS1	9	233	384	43037	2.079	4.329	0.0002704	4.835
DBP	9	233	386	43037	2.09	4.307	0.0002808	4.815
NFIA	3	233	58	43037	0.314	9.554	0.003882	4.81
NF-E2 (45 kDa)	3	233	58	43037	0.314	9.554	0.003882	4.81	NFE2	1.05133	0.000906164
SMAD2	5	233	144	43037	0.7796	6.413	0.001164	4.801
MITF	5	233	145	43037	0.785	6.369	0.001201	4.778
IRF1	6	233	202	43037	1.094	5.486	0.0008561	4.715
GABP alpha	5	233	148	43037	0.8013	6.24	0.001315	4.711
Lef-1	5	233	149	43037	0.8067	6.198	0.001354	4.69
TAL1	6	233	204	43037	1.104	5.433	0.0009009	4.682
TFCP2	2	233	29	43037	0.157	12.74	0.01076	4.665
FosB	3	233	62	43037	0.3357	8.937	0.004683	4.614
NFIB	2	233	30	43037	0.1624	12.31	0.01149	4.574
HSF2	2	233	30	43037	0.1624	12.31	0.01149	4.574
Pitx2	3	233	65	43037	0.3519	8.525	0.005345	4.479
NF-kB2 (p52)	4	233	109	43037	0.5901	6.778	0.002988	4.456
C/EBPepsilon	2	233	33	43037	0.1787	11.19	0.0138	4.322	CEBPE	2.40921	8.55e-06
TCF7L2 (TCF4)	8	233	375	43037	2.03	3.94	0.001079	4.219
GATA-6	4	233	120	43037	0.6497	6.157	0.004213	4.174
KLF4	7	233	312	43037	1.689	4.144	0.001652	4.112
RARbeta	2	233	36	43037	0.1949	10.26	0.01629	4.102
Fra-2	3	233	78	43037	0.4223	7.104	0.008843	3.981
SMAD1	4	233	131	43037	0.7092	5.64	0.005739	3.924
RBP-J kappa (CBF1)	4	233	132	43037	0.7146	5.597	0.005894	3.903
MEIS1	3	233	89	43037	0.4818	6.226	0.01264	3.641
CREB1	45	233	5091	43037	27.56	1.633	0.0006279	3.547
PAX8	3	233	93	43037	0.5035	5.958	0.01422	3.532	PAX8	1.0003	0.00287831
SMAD4	5	233	223	43037	1.207	4.141	0.007551	3.47
PPAR-gamma	6	233	306	43037	1.657	3.622	0.006692	3.396
MYOD	4	233	171	43037	0.9258	4.321	0.01426	3.21
EGR2 (Krox20)	3	233	107	43037	0.5793	5.179	0.02059	3.193
HNF4-alpha	8	233	509	43037	2.756	2.903	0.006887	3.187
RXRA	4	233	180	43037	0.9745	4.105	0.0169	3.08

## Sheet: Help - Table 1 - Table 1 - Tabl
Columns meaning
Input IDs	original probe/gene IDs in the activated dataset(s)
Network object name	Network object namenetwork object name in MetaBase
Actual	number of network objects in the activated dataset(s) which interact with the chosen object
n	number of network objects in the activated dataset(s)
R	number of network objects in the complete database or background list which interact with the chosen object
N	total number of gene-based objects in the complete database or background list
Expected	mean value for hypergeometric distribution (n*R/N)
Ratio	connectivity ratio (Actual/Expected)
z-score	z-score ((Actual-Expected)/sqrt(variance))
p-value	probability to have the given value of Actual or higher (or lower for negative z-score)

## Sheet: Info - Table 1 - Table 1 - Tabl
Info
General
Date	2016.04.14
Server	http://portal.genego.com
Version	MetaCore+MetaDrug® version 6.25 build 68346 scripts 68483.
Name	Leandro
Login	embrapa-cintra
Export Settings
Active Data
Names	Type	Size	Assembly
Spospre_Top	General Experiment	247			Threshold	0
					P-value	0.05
